# Supplementary material for: ARID1A and CTNNB1/β-Catenin Molecular Status Affects the Clinicopathologic Features and Prognosis of Endometrial Carcinoma: Implications for an Improved Surrogate Molecular Classification
Source: PubMed Central journal article supplement (PMC7956405; doi:10.3390/cancers13050950), 2021-02-25
Supplement: cancers-13-00950-s001.pdf [file cancers-13-00950-s001.pdf]

## Supplementary materials

**Table S1:** List of antibodies

| Antibody                               | Source           | Dilution | Method                                     |
|----------------------------------------|------------------|----------|--------------------------------------------|
| Mouse anti- $\beta$ -Catenin, clone 14 | Cell Marque, USA | RTU      | UltraCC1 x 32' at 95 °C - Ab 16' at 36 °C  |
| Rabbit anti-PTEN, clone SP218          | Ventana, USA     | RTU      | UltraCC1 x 56' at 100 °C - Ab 16' at 36 °C |
| Rabbit anti-ARID1A polyclonal          | Atlas antibodies | 1:90     | UltraCC1 x 32' at 95 °C - Ab 32' at 36 °C  |
| Mouse anti-p53, clone DO7              | Ventana, USA     | RTU      | UltraCC1 x 24' at 95 °C - Ab 12' at 36 °C  |
| Mouse anti-MLH1, clone M1              | Ventana, USA     | RTU      | UltraCC1 x 56' at 98 °C - Ab 32' at 36 °C  |
| Mouse anti-PMS2, clone A16-4           | Ventana, USA     | RTU      | UltraCC1 x 64' at 99 °C - Ab 32' at 36 °C  |
| Mouse anti-MSH2, clone G219-1129       | Ventana, USA     | RTU      | UltraCC1 x 56' at 95 °C - Ab 32' at 36 °C  |
| Rabbit anti-MSH6, clone SP93           | Ventana, USA     | RTU      | UltraCC1 x 64' at 100 °C - Ab 12' at 36 °C |
| Rabbit anti-Ki67, clone 30-9           | Ventana, USA     | RTU      | UltraCC1 x 32' at 99 °C - Ab 8' at RT      |

Visualization with OptiView DAB Detection kit, Ventana, USA

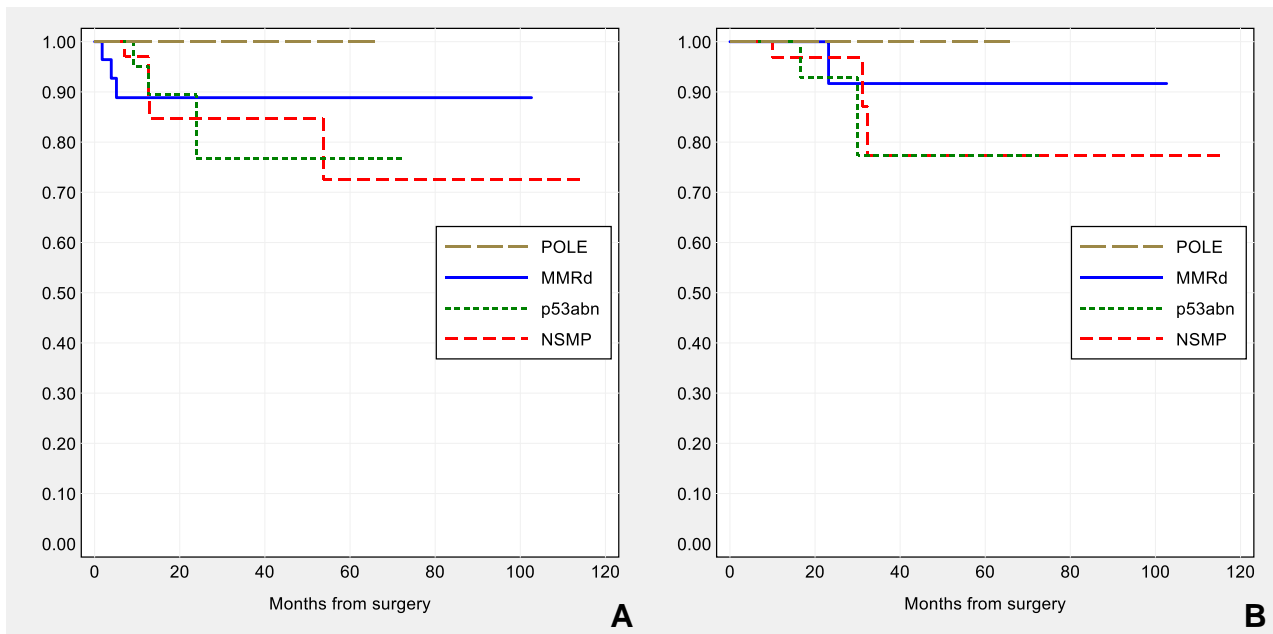

**Figure S1.** Kaplan–Meier estimates of disease-free survival (A) and overall survival (B) in patients at high-intermediate and high-risk according to ESMO (n = 99), by surrogate TCGA molecular groups.

**Table S2.** Clinicopathologic characteristics of *CTNNB1* mutated/ $\beta$ -catenin abnormal versus *CTNNB1* wild-type/ $\beta$ -catenin normal carcinomas. Values are counts (percentages) or mean  $\pm$  standard deviation [interquartile range].

| Characteristics                    | <i>CTNNB1</i> mutation/<br>$\beta$ -catenin abnormal<br>( <i>n</i> = 21; 16.8%) | <i>CTNNB1</i> wild-type/<br>$\beta$ -catenin normal<br>( <i>n</i> = 104; 83.2%) | <i>P</i> -value |
|------------------------------------|---------------------------------------------------------------------------------|---------------------------------------------------------------------------------|-----------------|
| Age, years                         | 54.9 $\pm$ 12.9<br>[44–64]                                                      | 64.3 $\pm$ 9.6<br>[58–71.5]                                                     | <0.001          |
| Body mass index, kg/m <sup>2</sup> | 30.6 $\pm$ 7.8<br>[24.6–34.2]                                                   | 26.8 $\pm$ 6.1<br>[22.7–29.3]                                                   | 0.016           |
| Tumor type                         |                                                                                 |                                                                                 | 0.224           |
| Endometrioid                       | 17 (81.0)                                                                       | 73 (70.2)                                                                       |                 |
| Dedifferentiated/Undifferentiated  | 4 (19.0)                                                                        | 13 (12.5)                                                                       |                 |
| Serous                             | 0 (0.0)                                                                         | 15 (14.4)                                                                       |                 |
| Clear cell                         | 0 (0.0)                                                                         | 3 (2.9)                                                                         |                 |
| TGCA molecular group               |                                                                                 |                                                                                 | 0.001           |
| <i>POLE</i>                        | 1 (4.8)                                                                         | 8 (7.7)                                                                         |                 |
| MMRd                               | 4 (19.0)                                                                        | 37 (35.6)                                                                       |                 |
| p53abn                             | 0 (0.0)                                                                         | 26 (25.0)                                                                       |                 |
| NSMP                               | 16 (76.2)                                                                       | 33 (31.7)                                                                       |                 |
| Heterogeneity                      | 7 (33.3)                                                                        | 42 (40.4)                                                                       | 0.546           |
| Grade                              |                                                                                 |                                                                                 | 0.071           |
| 1                                  | 10 (47.6)                                                                       | 26 (25.0)                                                                       |                 |
| 2                                  | 6 (28.6)                                                                        | 29 (27.9)                                                                       |                 |
| 3                                  | 5 (23.8)                                                                        | 49 (47.1)                                                                       |                 |
| Depth of invasion $\geq$ 50%       | 5 (23.8)                                                                        | 30 (28.8)                                                                       | 0.639           |
| Lymphovascular space invasion      | 5 (23.8)                                                                        | 32 (30.8)                                                                       | 0.524           |
| Lymph node status                  |                                                                                 |                                                                                 | 0.260           |
| Negative                           | 19 (90.5)                                                                       | 76 (73.1)                                                                       |                 |
| Positive                           | 2 (9.5)                                                                         | 22 (21.2)                                                                       |                 |
| Unknown/Not tested                 | 0 (0.0)                                                                         | 6 (5.8)                                                                         |                 |
| FIGO stage                         |                                                                                 |                                                                                 | 0.663           |
| IA                                 | 14 (66.7)                                                                       | 57 (54.8)                                                                       |                 |
| IB/II                              | 4 (19.0)                                                                        | 18 (17.3)                                                                       |                 |
| III                                | 3 (14.3)                                                                        | 27 (26.0)                                                                       |                 |
| IV                                 | 0 (0.0)                                                                         | 2 (1.9)                                                                         |                 |
| Extensive necrosis                 | 7 (33.3)                                                                        | 52 (50.0)                                                                       | 0.163           |
| MELF                               | 7 (33.3)                                                                        | 39 (37.5)                                                                       | 0.718           |
| Tumor budding                      | 6 (28.6)                                                                        | 46 (44.2)                                                                       | 0.184           |
| High sTILs                         | 11 (52.4)                                                                       | 78 (75.0)                                                                       | 0.037           |
| High iTILs                         | 9 (42.9)                                                                        | 77 (74.0)                                                                       | 0.005           |
| Mitoses/10 HPF                     | 37.6 $\pm$ 32.0<br>[10–60]                                                      | 58.2 $\pm$ 37.1<br>[30–81]                                                      | 0.019           |
| Ki67 proliferation index           | 41.8 $\pm$ 22.5<br>[19.7–63.1]                                                  | 50.9 $\pm$ 18.3<br>[38.0–67.6]                                                  | 0.049           |

**Table S3.** Clinicopathologic characteristics of *ARID1A* altered versus *ARID1A* wild-type carcinomas. Values are counts (percentages) or mean  $\pm$  standard deviation [interquartile range].

| <b>Clinicopathologic Characteristics</b> | <b><i>ARID1A</i> altered<br/>(n = 69; 55.2%)</b> | <b><i>ARID1A</i> wild-type<br/>(n = 56; 44.8%)</b> | <b>P-value</b> |
|------------------------------------------|--------------------------------------------------|----------------------------------------------------|----------------|
| Age, years                               | 63.0 $\pm$ 9.6<br>[56–71]                        | 62.4 $\pm$ 12.0<br>[55–72]                         | 0.742          |
| Body mass index, kg/m <sup>2</sup>       | 27.9 $\pm$ 6.8<br>[22.8–31.1]                    | 26.9 $\pm$ 6.3<br>[22.6–29.1]                      | 0.362          |
| Tumor type                               |                                                  |                                                    | 0.002          |
| Endometrioid                             | 54 (78.3)                                        | 36 (64.3)                                          |                |
| Dedifferentiated/<br>Undifferentiated    | 12 (17.4)                                        | 5 (8.9)                                            |                |
| Serous                                   | 3 (4.3)                                          | 12 (21.4)                                          |                |
| Clear cell                               | 0 (0.0)                                          | 3 (5.4)                                            |                |
| TGCA molecular group                     |                                                  |                                                    | <0.001         |
| <i>POLE</i>                              | 8 (11.6)                                         | 1 (1.8)                                            |                |
| MMRd                                     | 33 (47.8)                                        | 8 (14.3)                                           |                |
| p53abn                                   | 3 (4.3)                                          | 23 (41.1)                                          |                |
| NSMP                                     | 25 (36.2)                                        | 24 (42.9)                                          |                |
| Heterogeneity                            | 32 (46.4)                                        | 17 (30.4)                                          | 0.068          |
| Grade                                    |                                                  |                                                    | 0.028          |
| 1                                        | 17 (24.6)                                        | 19 (33.9)                                          |                |
| 2                                        | 26 (37.7)                                        | 9 (16.1)                                           |                |
| 3                                        | 26 (37.7)                                        | 28 (50.0)                                          |                |
| Depth of invasion $\geq$ 50%             | 22 (31.9)                                        | 13 (23.2)                                          | 0.283          |
| LVSI                                     | 25 (36.2)                                        | 12 (21.4)                                          | 0.071          |
| Lymph node status                        |                                                  |                                                    | 0.344          |
| Negative                                 | 50 (72.5)                                        | 45 (80.4)                                          |                |
| Positive                                 | 14 (20.3)                                        | 10 (17.9)                                          |                |
| FIGO stage                               |                                                  |                                                    | 0.850          |
| IA                                       | 38 (55.1)                                        | 33 (58.9)                                          |                |
| IB/II                                    | 14 (20.3)                                        | 8 (14.3)                                           |                |
| III                                      | 16 (23.2)                                        | 14 (25.0)                                          |                |
| IV                                       | 1 (1.4)                                          | 1 (1.8)                                            |                |
| Extensive necrosis                       | 35 (50.7)                                        | 24 (42.9)                                          | 0.381          |
| MELF                                     | 36 (52.2)                                        | 10 (17.9)                                          | <0.001         |
| Tumor budding                            | 35 (50.7)                                        | 17 (30.4)                                          | 0.022          |
| High sTILs                               | 56 (81.2)                                        | 33 (58.9)                                          | 0.006          |
| High iTILs                               | 57 (82.6)                                        | 29 (51.8)                                          | <0.001         |
| Mitoses/10 HPF                           | 56.0 $\pm$ 29.6<br>[32–70]                       | 53.2 $\pm$ 44.7<br>[15–90]                         | 0.674          |
| Ki67 proliferation index                 | 54.2 $\pm$ 16.8<br>[39.7–67.6]                   | 43.4 $\pm$ 20.7<br>[25.5–57.2]                     | 0.002          |

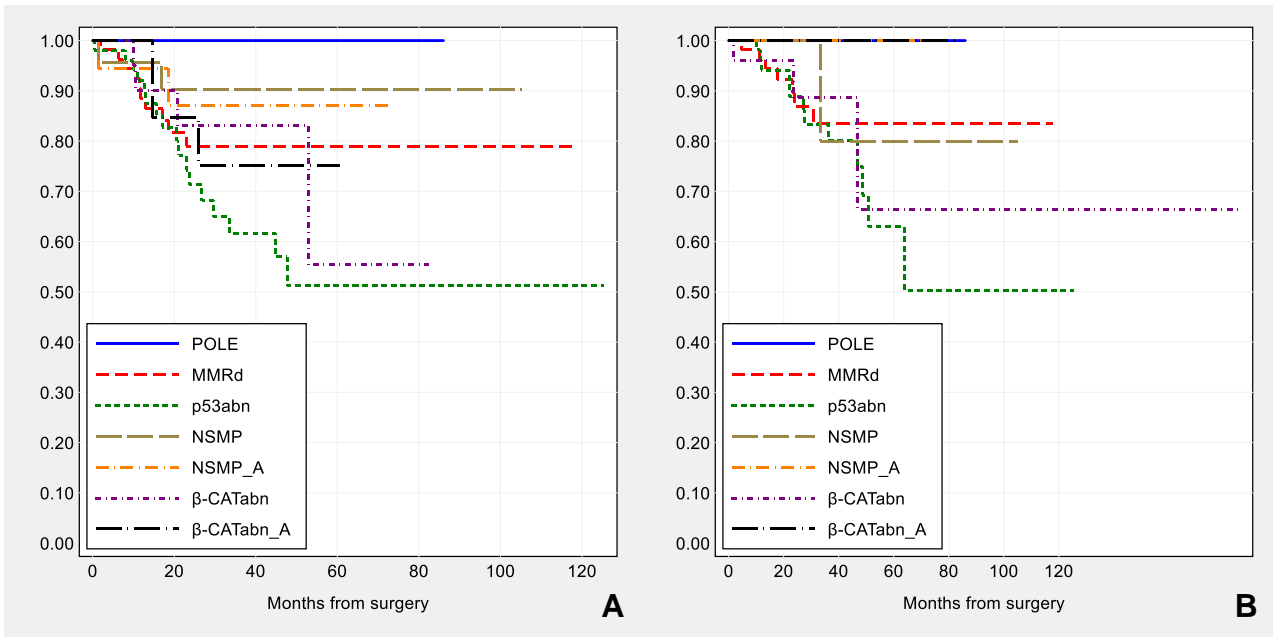

**Figure S2.** Kaplan–Meier estimates of disease-free survival (A) and overall survival (B) in TCGA case series, by molecular subgroup including  $\beta$ -catenin and ARID1A alterations (A: log-rank  $\chi^2 = 11.24$ , P-value = 0.081; B: log-rank  $\chi^2 = 11.69$ , P-value = 0.069).
